# Supplementary material
Source: PubMed Central journal article supplement (PMC5419425)
Supplement: NIHMS853636-supplement.pdf [file NIHMS853636-supplement.pdf]

**Supplemental Information:****Table S1: Primers used in this work.** Relates to Experimental Procedures:

| <b>Primer Name</b>              | <b>Sequence</b>                                |
|---------------------------------|------------------------------------------------|
| MpPksCT-g5                      | ATGATTGACTCAACTTCGCACTCAAATCTGAG               |
| MpPksCT-g3                      | TTAATCTAGAAATCCCATGGTCTTCCATGC                 |
| MpPksCT-ex1-5                   | GCATATTAATGATTGACTCAACTTCGCACTC                |
| MpPksCT-ex1-3.2                 | GTCAACGATGACAGACACATATGCATCAGGGAATGTCTCGAGAACG |
| MpPksCT-ex2-5.2                 | CTCGAGACATTCCCTGATGCATATGTGTCTGTTCATCGTTGAC    |
| MpPksCT-ex2-3                   | GCATGCGGCCGCATCTAGAAATCCCATGGTCTTCCATG         |
| MpPksCT-SAT-3                   | GCATGCGGCCGCTCCACCGAGAAGCTGCCC                 |
| MpPksCT-SKM3-3                  | GCATGCGGCCGCAGAGCGCTGGGATGCGTCTTG              |
| MpPksCT-PT-5                    | GCATATTAATGACAGCAATTATCGAGGCACC                |
| MpPksCT-PT-3                    | GCATGCGGCCGCGCCGCTTACCGCAGTAGACG               |
| MpPksCT-ACP-5                   | GCATATTAATGACACCTCCGACAAAAGAAAGCGC             |
| MpPksCT-ACP-3                   | GCATGCGGCCGCACCGTTACCATTAACGACACCATTAGTGC      |
| MpPksCT-CMeT-5                  | GCATATTAATGGTCTTGTTTCTGAGCTAGGGGG              |
| MpPksCT-CMeT-3                  | GCATGCGGCCGCGTCTGTCAATGGGACCTGCACC             |
| MpPksCT-CMeT <sub>AseI</sub> -5 | CGAGGAGGCCAGACTGATTGATATCAACG                  |
| MpPksCT-CMeT <sub>AseI</sub> -3 | CGTTGATATCAATCAGTCTGGCCTCCTCG                  |
| MpAct-5                         | GGAATTCTGCAGATTCTACAACGAACTCCG                 |
| MpAct-3                         | GGAATTCTGCAGTCAGGGAGTTCATAGGAC                 |
| MpPksCT-CMeT-Y1955F-5           | GTCACTGATGTCTTTGCCAAATCTCC                     |
| MpPksCT-CMeT-Y1955F-3           | GGAGATTTGGCAAAGACATCAGTGAC                     |
| MpPksCT-CMeT-Y1955A-5           | GTCACTGATGTCGCGGCCAAATCTCC                     |
| MpPksCT-CMeT-Y1955A-3           | GGAGATTTGGCCGCGACATCAGTGAC                     |
| MpPksCT-CMeT-H2067A-5           | CAAATTGTGTGGCGGCGACCCGG                        |
| MpPksCT-CMeT-H2067A-3           | CCGGGTCGCCGCCACACAATTTG                        |
| MpPksCT-CMeT-H2067Q-5           | CAAATTGTGTGCAGGCGACCCGG                        |
| MpPksCT-CMeT-H2067Q-3           | CCGGGTCGCCTGCACACAATTTG                        |

**Figure S1, relates to Figures 1 and 2: Domain deconstruction, exon revision, and starter unit verification for PksCT.**

A) Sequence conservation, predicted secondary structure, and local hydrophobicity are combined to generate an UMA score for each position. Low scores indicate likely linker regions and were used to guide the domain boundaries for mono- or multi-domain expression constructs. For details on input sequences and algorithm settings, please see Supplemental Experimental Procedures.

B) Five independent clones amplified from a cDNA library generated from total RNA under citrinin producing conditions. Each clone exactly matched the FGENSEH prediction for the exon 1:exon 2 boundary.

C) Radiolabel assay of acetyl starter unit transfer in PksCT. Lane 1: PksCT SAT, Lane 2: PksCT SAT + ACP without Sfp activation, Lane 3: PksCT SAT + ACP with Sfp activation. NR-PKS ACP domains are often partially phosphopantetheinylated during expression, accounting for the low ACP signal in lane 2.

A)

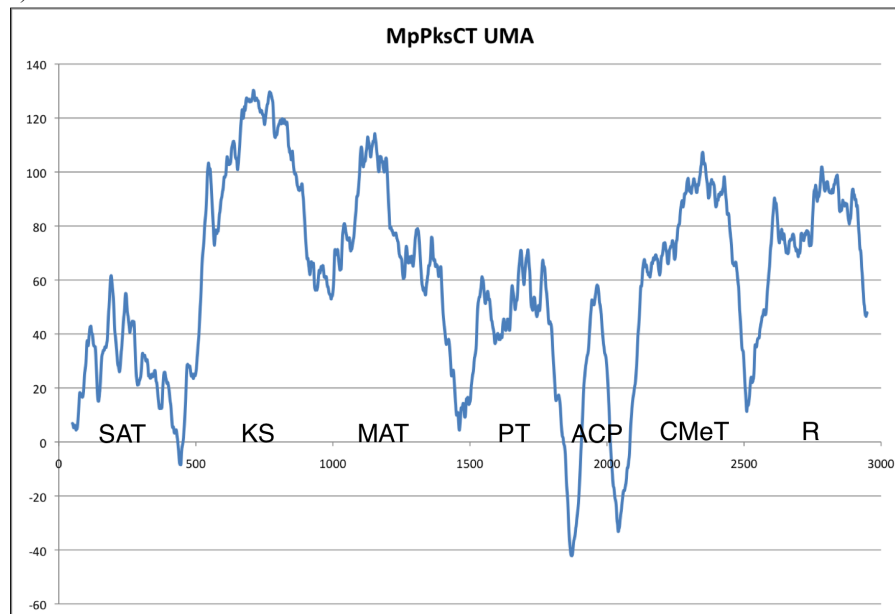

B)

```

*****
Mp_PksCT_orig  GATCCGAAAGGCTACTGTCGTCGCCGAAAGGAAAGTCAGTGGTGTTCAGGCTAC----CAGGCAAA-----CGGTAACTGCTGTACG-----GCAATGTGTGTGTCATGCTTACCAGAGAGGTGG 648
clone_1        GATCCGAAAGGCTACTGTCGTCGCCGAAAGGAAAGTCAGTGGTGTTCAGGCTGGTGGAAATGCGCCGAATTCAGTACCTATCCACAGTCTCGAGCAATCCCGATGCAATGTGTGTGTCATGCTTACCAGAGAGGTGG 747
clone_2        GATCCGAAAGGCTACTGTCGTCGCCGAAAGGAAAGTCAGTGGTGTTCAGGCTGGTGGAAATGCGCCGAATTCAGTACCTATCCACAGTCTCGAGCAATCCCGATGCAATGTGTGTGTCATGCTTACCAGAGAGGTGG 750
clone_3        GATCCGAAAGGCTACTGTCGTCGCCGAAAGGAAAGTCAGTGGTGTTCAGGCTGGTGGAAATGCGCCGAATTCAGTACCTATCCACAGTCTCGAGCAATCCCGATGCAATGTGTGTGTCATGCTTACCAGAGAGGTGG 749
clone_4        GATCCGAAAGGCTACTGTCGTCGCCGAAAGGAAAGTCAGTGGTGTTCAGGCTGGTGGAAATGCGCCGAATTCAGTACCTATCCACAGTCTCGAGCAATCCCGATGCAATGTGTGTGTCATGCTTACCAGAGAGGTGG 750
clone_5        GATCCGAAAGGCTACTGTCGTCGCCGAAAGGAAAGTCAGTGGTGTTCAGGCTGGTGGAAATGCGCCGAATTCAGTACCTATCCACAGTCTCGAGCAATCCCGATGCAATGTGTGTGTCATGCTTACCAGAGAGGTGG 749
Mp_PksCT_rev   .....610.....620.....630.....640.....650.....660.....670.....680.....690.....700.....710.....720.....730.....740.....750

```

C)

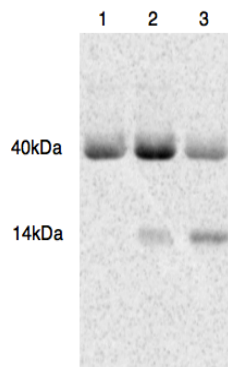

**Table S2, relates to Figure 2: Plasmids used in this work:**

| <b>PksCT domain(s)</b> | <b>Sequence</b> | <b>Plasmid name</b>   | <b>Parent vector</b> | <b>Tag</b> | <b>MW (kDa)</b> |
|------------------------|-----------------|-----------------------|----------------------|------------|-----------------|
| SAT                    | M1-G380         | pEMpPksCT-SAT         | pET-24a              | C-His6     | 41.8            |
| SAT-KS-MAT             | M1-I1288        | pEMpPksCT-SKM3        | pET-24a              | C-His6     | 144.0           |
| PT                     | T1285-G1651     | pEMpPksCT-PT          | pET-24a              | C-His6     | 41.5            |
| ACP                    | T1652-G1779     | pEMpPksCT-ACP         | pET-24a              | C-His6     | 15.0            |
| CMeT                   | V1780-D2182     | pEMpPksCT-CMeT        | pET-24a              | C-His6     | 46.6            |
| CMeT-Y1955A            | V1780-D2182     | pEMpPksCT-CMeT-Y1955A | pET-24a              | C-His6     | 46.6            |
| CMeT-Y1955F            | V1780-D2182     | pEMpPksCT-CMeT-Y1955F | pET-24a              | C-His6     | 46.6            |
| CMeT-H2067A            | V1780-D2182     | pEMpPksCT-CMeT-H2067A | pET-24a              | C-His6     | 46.6            |
| CMeT-H2067Q            | V1780-D2182     | pEMpPksCT-CMeT-H2067Q | pET-24a              | C-His6     | 46.6            |
| CMeT-R                 | V1780-D2593     | pEMpPksCT-CMeT-R      | pET-24a              | C-His6     | 92.7            |

**Table S3, relates to Figure 3: Crystallographic data collection and refinement statistics.**

|                                       | CMeT native               |                      | CMeT SeMet           |
|---------------------------------------|---------------------------|----------------------|----------------------|
| <b>Data collection</b>                |                           |                      |                      |
| Space group                           | H3                        | H3 <sup>†</sup>      | H3 <sup>†</sup>      |
| Cell dimensions                       |                           |                      |                      |
| a, b, c (Å)                           | 98.37, 98.37, 133.43      | 98.52, 98.52, 133.20 | 98.13, 98.13, 124.45 |
| $\alpha$ , $\beta$ , $\gamma$ (°)     | 90.0, 90.0, 120.0         | 90.0, 90.0, 120.0    | 90.0, 90.0, 120.0    |
| Wavelength (Å)                        | 0.99998                   | 1.90747              | 0.97929              |
| Swipes                                | 1                         | 2                    | 2                    |
| Resolution (Å)                        | 71.80 – 1.65 <sup>‡</sup> | 71.85 - 2.05         | 50.21 – 1.85         |
| R <sub>merge</sub> (%) <sup>*</sup>   | 8.0 (159.6)               | 8.4 (102.9)          | 13.5 (274.2)         |
| I/ $\sigma$ I <sup>*</sup>            | 10.61 (1.37)              | 15.62 (1.38)         | 13.75 (1.12)         |
| CC <sub>1/2</sub> (%) <sup>*</sup>    | 99.9 (76.0)               | 99.8 (71.1)          | 99.9 (57.1)          |
| Completeness (%) <sup>*</sup>         | 98.9 (94.3)               | 97.9 (81.7)          | 99.8 (99.7)          |
| Redundancy <sup>*</sup>               | 6.6 (6.6)                 | 8.5 (2.6)            | 10.4 (10.2)          |
| Unique reflections <sup>*</sup>       | 57,453 (4,045)            | 59,253 (3,685)       | 76,184 (5,646)       |
| <b>Refinement</b>                     |                           |                      |                      |
| Resolution (Å)                        | 71.80 – 1.65              |                      |                      |
| R <sub>work</sub> / R <sub>free</sub> | 0.19 / 0.22               |                      |                      |
| Ramachandran<br>favored / outlier (%) | 99.48 / 0.00              |                      |                      |
| No. atoms                             | 6,512                     |                      |                      |
| Protein                               | 6,173                     |                      |                      |
| Ligand                                | 45                        |                      |                      |
| Solvent                               | 294                       |                      |                      |
| B-factors                             | 36.22                     |                      |                      |
| Protein (Å <sup>2</sup> )             | 36.29                     |                      |                      |
| Ligand (Å <sup>2</sup> )              | 26.84                     |                      |                      |
| Solvent (Å <sup>2</sup> )             | 36.11                     |                      |                      |
| R.m.s deviations                      |                           |                      |                      |
| Bond lengths (Å)                      | 0.009                     |                      |                      |
| Bond angles (°)                       | 0.975                     |                      |                      |

The resolution cutoff was determined by CC<sub>1/2</sub> criterion (Karplus and Diederichs, 2012). \*, Highest resolution shell is shown in parenthesis. Datasets of native CMeT were acquired from the same crystal. <sup>†</sup>Anomalous data processing was applied. <sup>‡</sup>A deprecated conservative resolution cutoff at I/ $\sigma$ I=2.91 and Rmerge= 69.8% is reached at a resolution of 1.84 Å.

Figure S2, relates to Figures 2 and 5A: UV-Vis spectra for compounds 2-8.

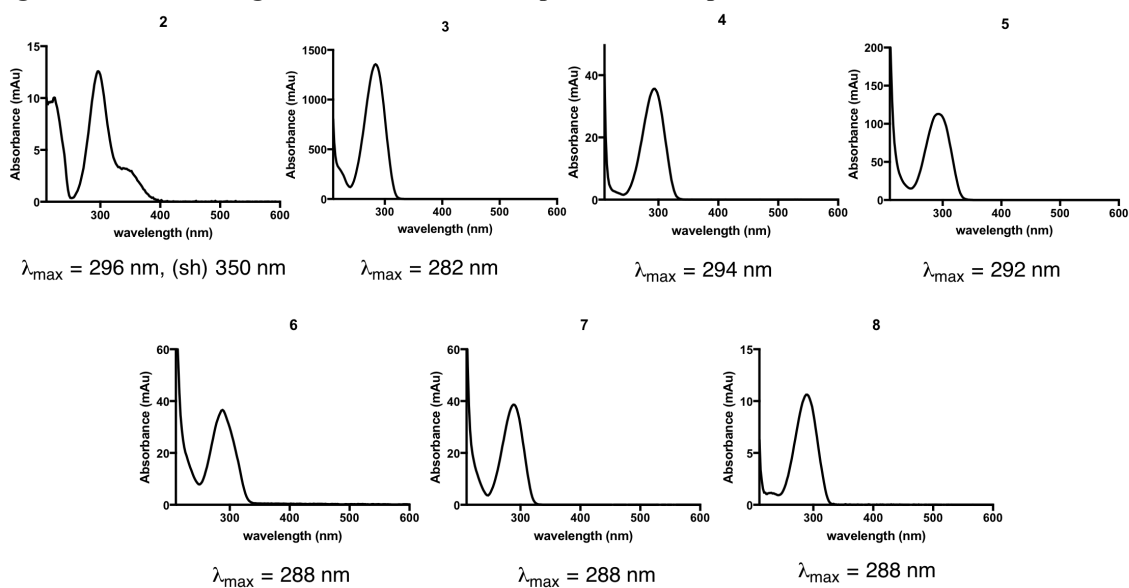

Table S4, relates to Figures 2 and 5A: Detected masses for compounds 2-8.

| # | Calculated [MH <sup>+</sup> ] or [MNa <sup>+</sup> ] m/z | Detected m/z (ppm) | Formula                                                                                        |
|---|----------------------------------------------------------|--------------------|------------------------------------------------------------------------------------------------|
| 2 | 237.1127                                                 | 237.1121(2.53)     | C <sub>13</sub> H <sub>17</sub> O <sub>4</sub>                                                 |
| 3 | 127.0395                                                 | 127.0391 (3.15)    | C <sub>6</sub> H <sub>7</sub> O <sub>3</sub>                                                   |
| 4 | 155.0708                                                 | 155.0704 (2.58)    | C <sub>8</sub> H <sub>11</sub> O <sub>3</sub>                                                  |
| 5 | 211.0970                                                 | 211.0970 (0.00)    | C <sub>11</sub> H <sub>15</sub> O <sub>4</sub>                                                 |
|   | 233.0787                                                 | 233.0790 (1.29)    | C <sub>11</sub> H <sub>14</sub> O <sub>4</sub> Na                                              |
|   | 169.0865                                                 | 169.0859 (2.37)    | C <sub>9</sub> H <sub>13</sub> O <sub>3</sub> [-C <sub>2</sub> H <sub>2</sub> O]               |
| 6 | 253.1075                                                 | 253.1076 (0.40)    | C <sub>13</sub> H <sub>17</sub> O <sub>5</sub>                                                 |
|   | 275.0895                                                 | 275.0893 (0.73)    | C <sub>13</sub> H <sub>16</sub> O <sub>5</sub> Na                                              |
|   | 211.0970                                                 | 211.0965 (2.73)    | C <sub>11</sub> H <sub>15</sub> O <sub>4</sub> [-C <sub>2</sub> H <sub>2</sub> O]              |
|   | 155.0708                                                 | 155.0701 (4.51)    | C <sub>8</sub> H <sub>11</sub> O <sub>3</sub> [-C <sub>5</sub> H <sub>6</sub> O <sub>2</sub> ] |
| 7 | 141.0552                                                 | 141.0553 (0.71)    | C <sub>7</sub> H <sub>9</sub> O <sub>3</sub>                                                   |
| 8 | 141.0552                                                 | 141.0552 (0)       | C <sub>7</sub> H <sub>9</sub> O <sub>3</sub>                                                   |



**Figure S3, relates to Figure 4. Alignment of 51 CMeT domains from PKSs and FASs.** The alignment reveals a high sequence conservation of active CMeT domains, whereas inactive  $\Psi$ CMeT domains of FAS and some HR-PKS reveal deletions predominantly in the *N*-terminal subdomain and a low sequence conservation of active site residues. Sequence numbers, secondary structure elements, and active site residues correspond to PksCT. All sequences are labeled as protein name (organism abbreviation) Uniprot number and sorted according to their phylogenetic distance depicted in Figure 4. The sequence of PksCT corresponds to Supplemental Item 1. Multienzyme family classifications are indicated in colored groups. (°, endosymbiont of this organism; ‡, diketide synthase)

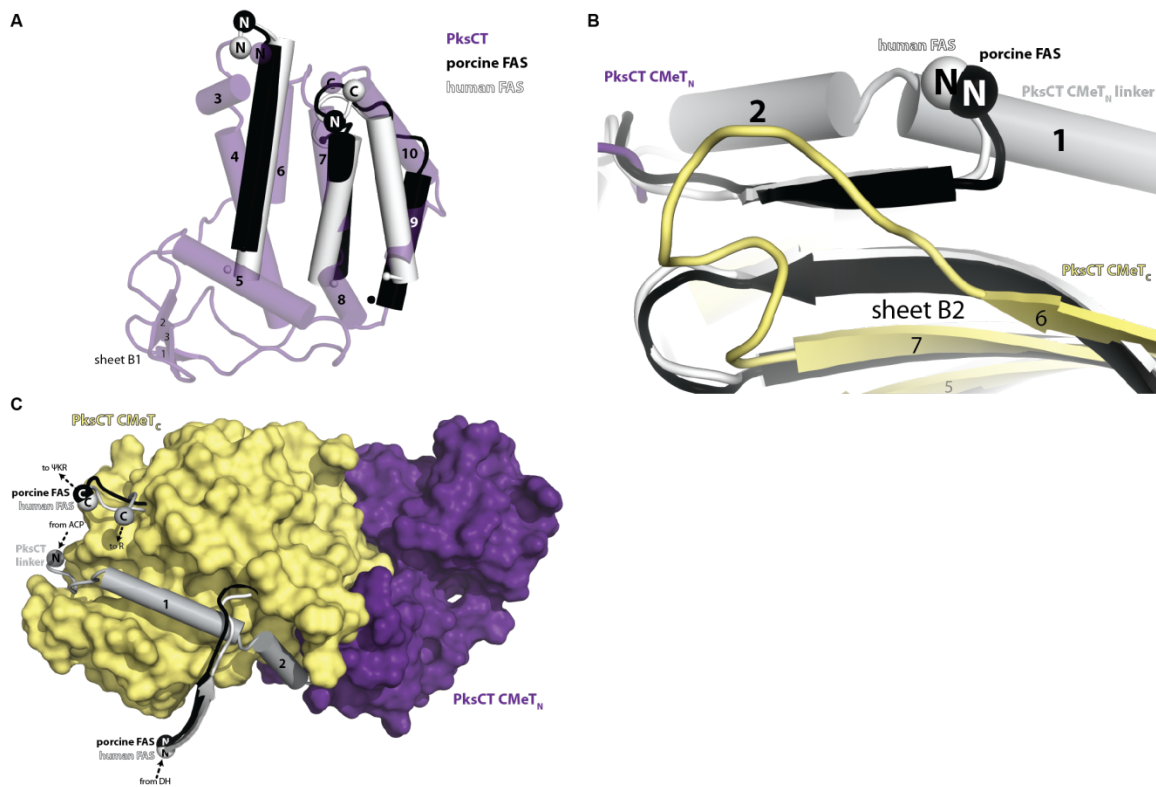

**Figure S4, relates to Figure 3. Structural comparison of PksCT CMeT with mammalian FAS ΨCMeT domains.**

(A) A superposition of the truncated and largely disordered *N*-terminal subdomain of the animal FAS ΨCMeT (porcine: black; human: white) with PksCT CMeT indicates a structural conservation of three helices, overlapping with PksCT CMeT helices 4, 7 and 9/10. Ends of disordered regions are indicated by small spheres. Secondary structures are assigned according to Figure 3B.

(B) In FAS, the linker connecting to the *N*-terminal subdomain contains a  $\beta$ -strand that extends the central  $\beta$ -sheet of the *C*-terminal subdomain. In PksCT CMeT, the position of this  $\beta$ -strand is occupied by helix 2 of the *N*-terminal linker leading into CMeT.

(C) In PksCT the *N*-terminal linker wraps in a surface groove around the *C*-terminal subdomain and positions the *N*- and *C*-terminal linker termini in close proximity to each other, whereas in FASs the *N*-terminal linker contacts this domain in a different location distant to the *C*-terminal linker terminus.



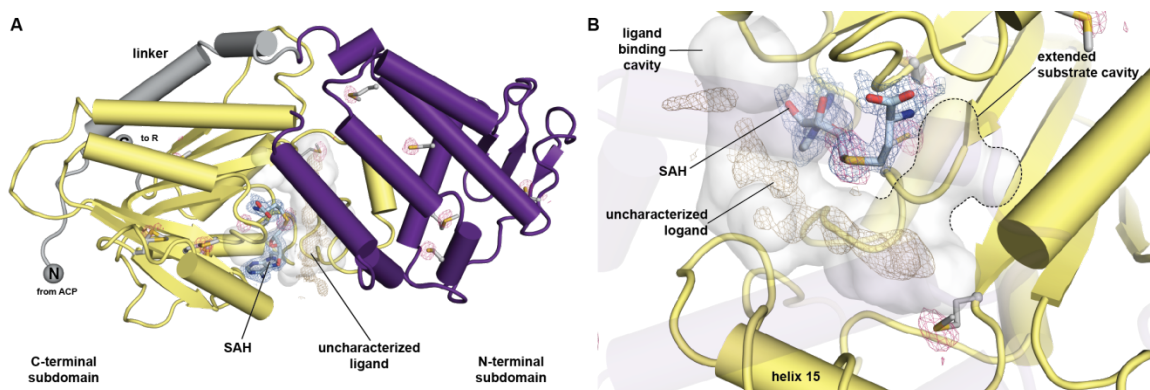

**Figure S5, relates to Figure 3A and 3C. Uncharacterized ligand and anomalous difference density.**

(A) The active site tunnel reveals significant  $F_O - F_C$  omit difference density at  $2.5 \sigma$  (brown) with a featured shape, which does not match components of the crystallization condition. Anomalous difference density at  $3.7 \sigma$  (pink), indicates the presence of sulfur in methionine and cysteine residues as well as in SAH, but no significant difference density as part of the ligand.

(B) The close up view on the active site reveals the expansion of the ligand's difference density along the central tunnel with its end in the junction to the extended substrate cavity. The same contour level of the SAH difference density (blue) suggests either a partial occupancy or various conformations of the less defined ligand. The extent of difference density corresponds approximately to an atomistic binding interface of  $500 \text{ \AA}^2$ .

**Item S1, relates to Figure 1: Revised *M. purpureus* PksCT sequence.** Residues encoded by alternate exon boundary are underlined:

MIDSTSHSNLRSKAFIFGPQDLSFDVRSFNKLHSQLQNHQWVLDALASLPKLWDNFAASDQKVQQ  
 SNTGKLLLENLNAWISSGVAPEEAFPLPNVLLSPLVVIGQLVEYMTFLKAAFDDLKGGKHDLPISIKED  
 TETFGGLCTGTLCAFAVACSSNIADIQHYGAVAAARLAMLVGAIVDTEEVLSDPEGKSVSFSASWNSA  
EFSDSFTHVLETFPDAYVSVIVDQRRATLTASKKTAPAIERLKQEGAHVTSIALSGRFHWKHKHQD  
 AVSSLIQFCGLDPLQLADATKMLLPSRSSSDGQYITGKHELALRAILLEQSEWYKTCRISYLSK  
 FIMDDAAVICFGPERCMPPTLARKLGPRLTYVSEIDISSRVPQGQLLGGTQKLNLTDLPERIAVIG  
 MACRLPGAEDHEGFWEILKTGQSQHREVPEDRFGMATAWREADKRKWKYGNFIDNYDTFDHKFF  
 KKSPREMASTDPQHRLMLQVAYQAVEQSGYFRNNGTNRRIKCFMGVGNVDYEDNACYPANAY  
 SATGNLKSFLAGKISHHFGWTGPSLTLDTACSSSSVAIHQACRSILSGECNGALAGGVNVITSPNW  
 YHNLGASFLSPTGQCKPFDKAGDGYCRGEGVGAVFLKRLSSAIADGDQVFGVIASSTKVYQNQN  
 CTAITVPNAISLSEFTDVVRQARLEPKDITLVEAHGTGTAVGDPAEYDGIKRAVFGGPIRSVDVLSLG  
 SVKGLVGHTECASGVVSLIKTLLMIQGFIPQASFSINPSLNAKAEKIEISTRKLPWDAPFRAALI  
 NNYGASGSNAMSVMVTQPPNLTETPSTPLPGKSYPFWISAFDQQLSQSYVRRRLRFLEKHAADKNLS  
 VANLSFQVACQSNWSLPQALVFSASTKEELNRALASFEKGSTDFPSVQLPDPKPVILCFGGQVSTY  
 VGLDQEVYNSTAILRHYLDQCDAMCLSLGLQSIYPAIFQRSPIDIVQLQTALFAMQYSCAKAWID  
 SGLKVASVVGHSFGELIALCVSNAVSLKDAVKMISGRARLIKERWGADKGSMAVEADLSDVEAL  
 LAKVKSQMGSETGLAIACYNASKSFTLAGPTKDVHAEENLLKNDPDFSGIRYKRLNVTNAFHSVL  
 VDALIDDLES LGQGIRFKEPTIKLERATEQESTSTLNANYVATHMRKPVFFAQAVKRLSDKFPVAI  
 WLEAGSNSTITAMASRALGTSNSSFQAVNITSEGAFRFLCDDTTVKLWKEGQKVSFWAHHRLQTPM  
 YTPVLLPPYQFEKSRHWMDLKVPPKPEASVQVAEQTAIIEAPKGLTTFVGYQDASQRSVRFVNV  
 TTEKFNRLLSGHIMANAAAVCPGMFQVEIALDALTSRPEFQARSFIPELHDLRHYQPLVRDESRA  
 VWIEAHCNAEGLVWNWKLTA SDDKSGSVTHTSGTITFQAADSVQVKSEFEKLRRLIGRKRCLQ  
 LLDSNVADDILQGRNIYRAFTEVIDYKEIYRHVTKIAGRDNESAGRVIKTYDGETWLDTVLTDVFC  
 QVAGIFVNLMTTKIDL SERGIFCDGIDRWLRAPNAGSNTPSQVYEVFALHHCESDSKYLSDFVAF  
 DAREGSLVEVALGISYQKVSISGIRRVLSKGM PAGLQPVPTSPA AVAAIKTVSPPP VADSPLVDGS  
 STAVSGTPPTKKAPKAPSDITGKMREIICNLSGLEPDEVKDDSDLVELGIDSLMSMELAREVDLAF  
 KTTIDVTQLIDVTD FRSLVECMQRILGIDNQEDNTYLAEGLNGHEGVVTNGNAYHVNGTNGVNV  
 GNGVLFPELGG SILPKSAILDAFRIAKEATDDFILNGQLGTYYNEVMRSTELCVAHIVNAFEQLGC  
 PIRSAAYQRLERVPYLPKHERFMNLIYGLLEE AR LIDINGSEITR TSVPVSTKSVETMLEELLHDEP  
 LHAAEHKLTSLTGSKFAD CITGKEDGLQLIFGSPEGREIVTDVYAKSPINAVWIQQAEFFLEQLVKR  
 LPNTGEPLRILEMGAGTGGTTVKMLPLLERLGPVPEYTM TDLSSSLIAAARKRFRKYPFMKFKVV  
 NIESPPDPQLVHSQHILATNCVHATRNL EISTRNIHRILRDPGFLLLLEMTEQVPWVDFIFGLLEGW  
 WLFEDGRRHALQPATHWKKILTSVGYGHVDWTEGTRPEANIQRLLI ALASEPRYDHTPQSLQPPVQ  
 VPLTDIAGRQEIIDTYIREYTEDFRALPIPGIQAVMPAPTGHCVLVTGATGSLGSHVVG YLSRLPN  
 VHTVVCLNRRSTVPATIRQEEALKV RGISLDDNSRSKLVVLEVETAKPLLGLPVETYQKLVNTATH  
 IVHSAWPMSLTRPIRGYESQFKVMQN LINLAREVA AWRPVPFKFSFQFISSIGVVGYYPLRYGEIIP  
 EETMTADSVLPVGYAEAKLVCERMLDETLHQYPDRFRPMAVRIAQIAGSTSNGHWNPVEHFAFLI  
 KSSQTLKALPDFDGLSWCPVDDVSATL GELLISNTTPYSIYHIENPSRQQWRKMVKTLAQSLDIPR  
 DGIIPFDQWIERVRNSSASINDNPARQLLEFFDQHFIRMSCGNLILD TTKTREHSATLRERGPVGPGL  
 VEKYISAWKTMGFLD

## Supplemental Procedures

### UMA-guided domain dissection

UMAv2.18 was used with the BLOSUM62 matrix. Secondary structure predictions were generated with ProteinPredict ((Yachdav et al., 2014), <https://www.predictprotein.org/>). Comparative sequences were curated from NCBI using the Conserved Domain Architecture Retrieval Tool (Geer et al., 2002) with PksCT as the query and included the following entries: XP\_001217248, ANID\_07903, ANID\_00523, CAN87161, XP\_001273475, XP\_002381902, EHA28237, XP\_001818926, XP\_001393501, CAK40124, XP\_660990.1, XP\_658638.1, AAR90253.1, BAE66025.1, XP\_001243185.1, CAK48487.1, XP\_001559289.1, XP\_002149737.1, XP\_002567553.1, XP\_002487778.1, XP\_002340070.1, XP\_002384396.1, XP\_002848394.1, XP\_003070229.1, XP\_003010590.1, XP\_001395291.2, EHA25844.1, EHA28237.1, and GAA92425.1.

### Supplemental References

Geer, L.Y., Domrachev, M., Lipman, D.J., and Bryant, S.H. (2002). CDART: protein homology by domain architecture. *Genome Res* 12, 1619-1623.

Yachdav, G., Kloppmann, E., Kajan, L., Hecht, M., Goldberg, T., Hamp, T., Honigschmid, P., Schafferhans, A., Roos, M., Bernhofer, M., *et al.* (2014). PredictProtein-an open resource for online prediction of protein structural and functional features. *Nucleic Acids Research* 42, W337-W343.
